# Supplementary material
Source: PubMed Central journal article supplement (PMC6697571)

**A**

|         | Genotype                                    |
|---------|---------------------------------------------|
| D4M3.A  | BRAFV600E/wt Pten <sup>-/-</sup>            |
| YUMM3.3 | BRAFV600E/wt<br>Cdkn2 <sup>-/-</sup>        |
| YUMM4.1 | Pten <sup>-/-</sup><br>Cdkn2 <sup>-/-</sup> |

**B**

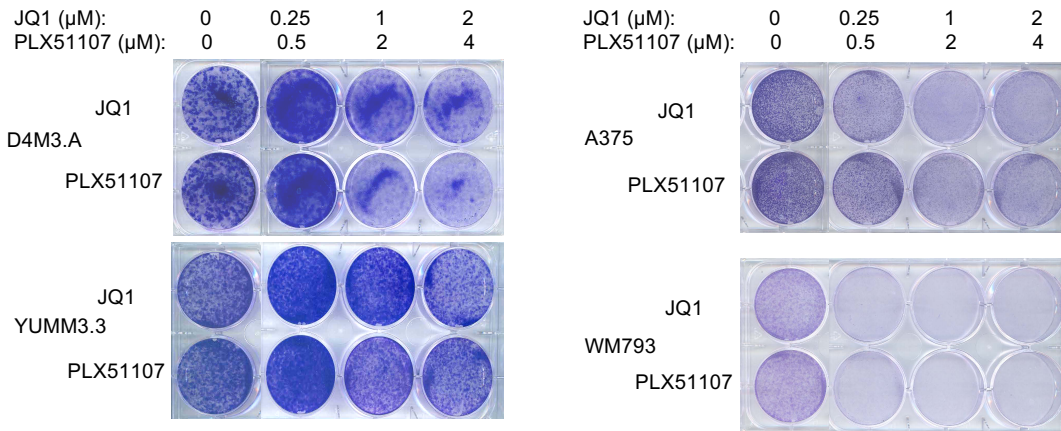

**C**

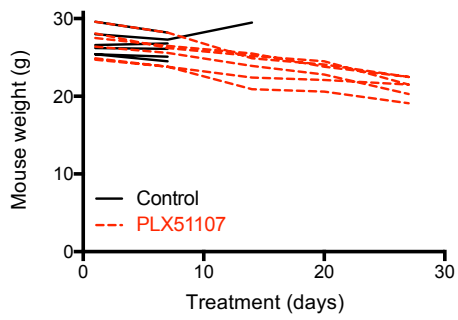

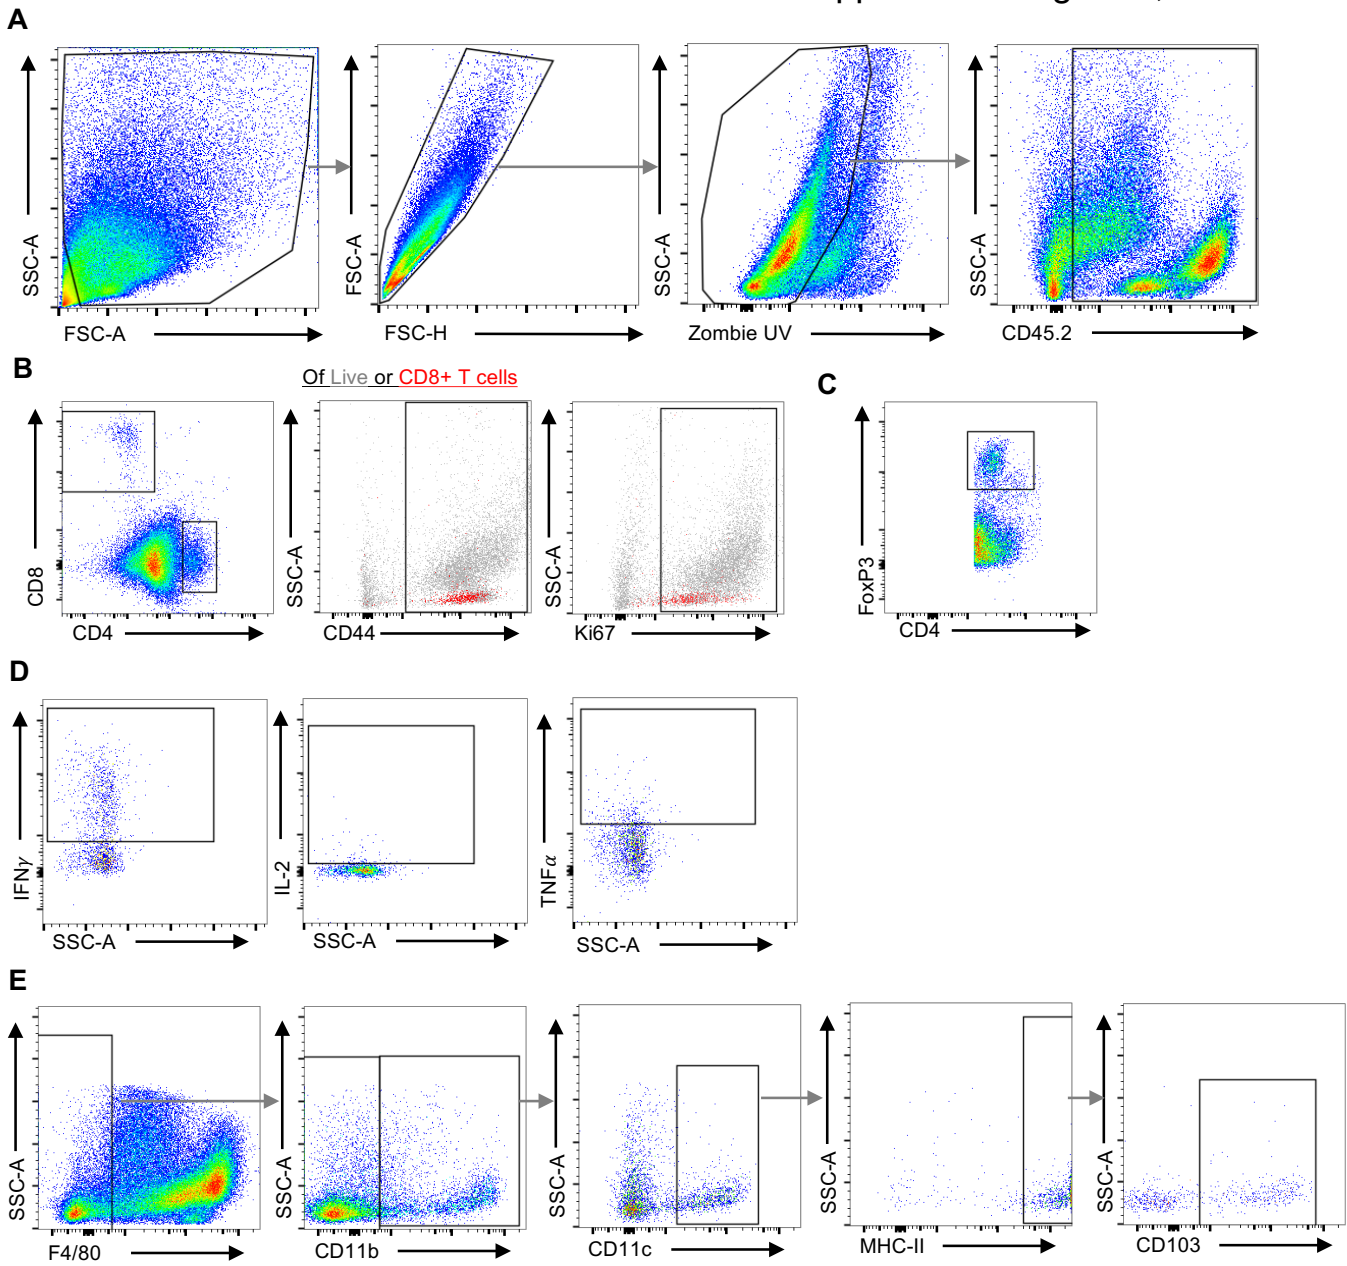

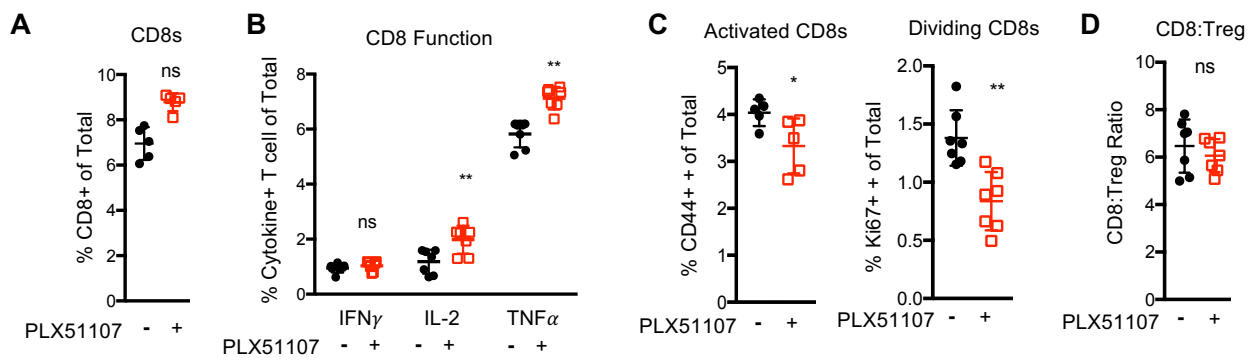

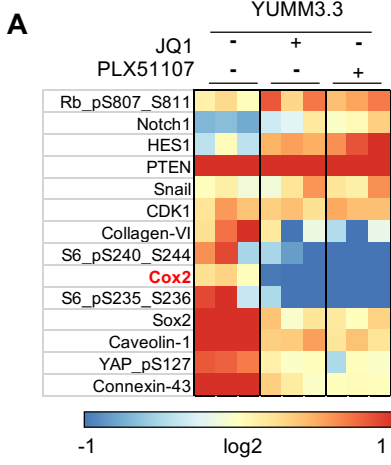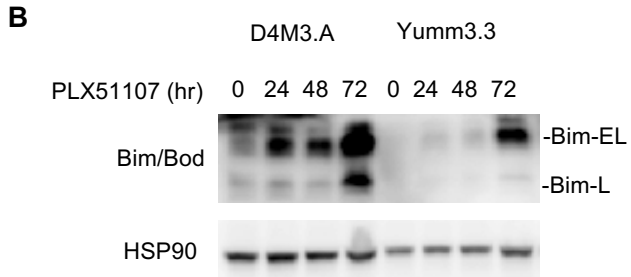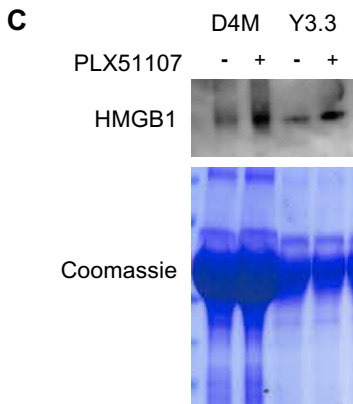

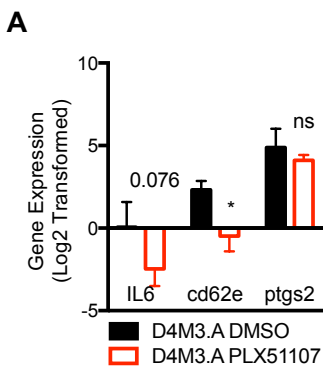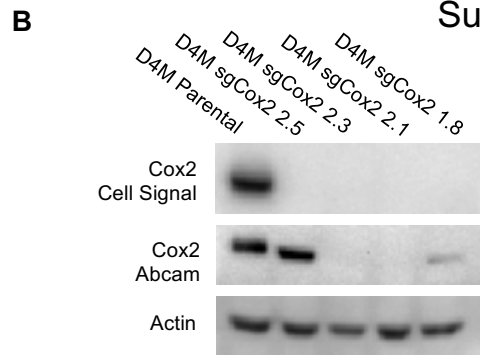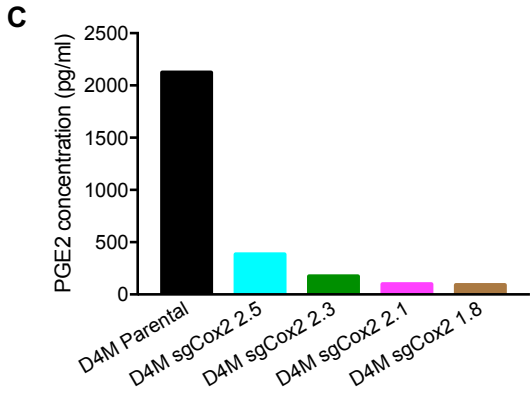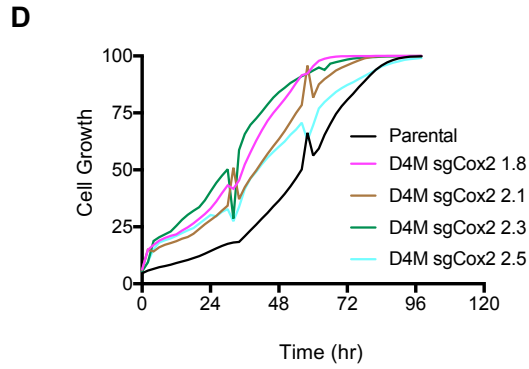

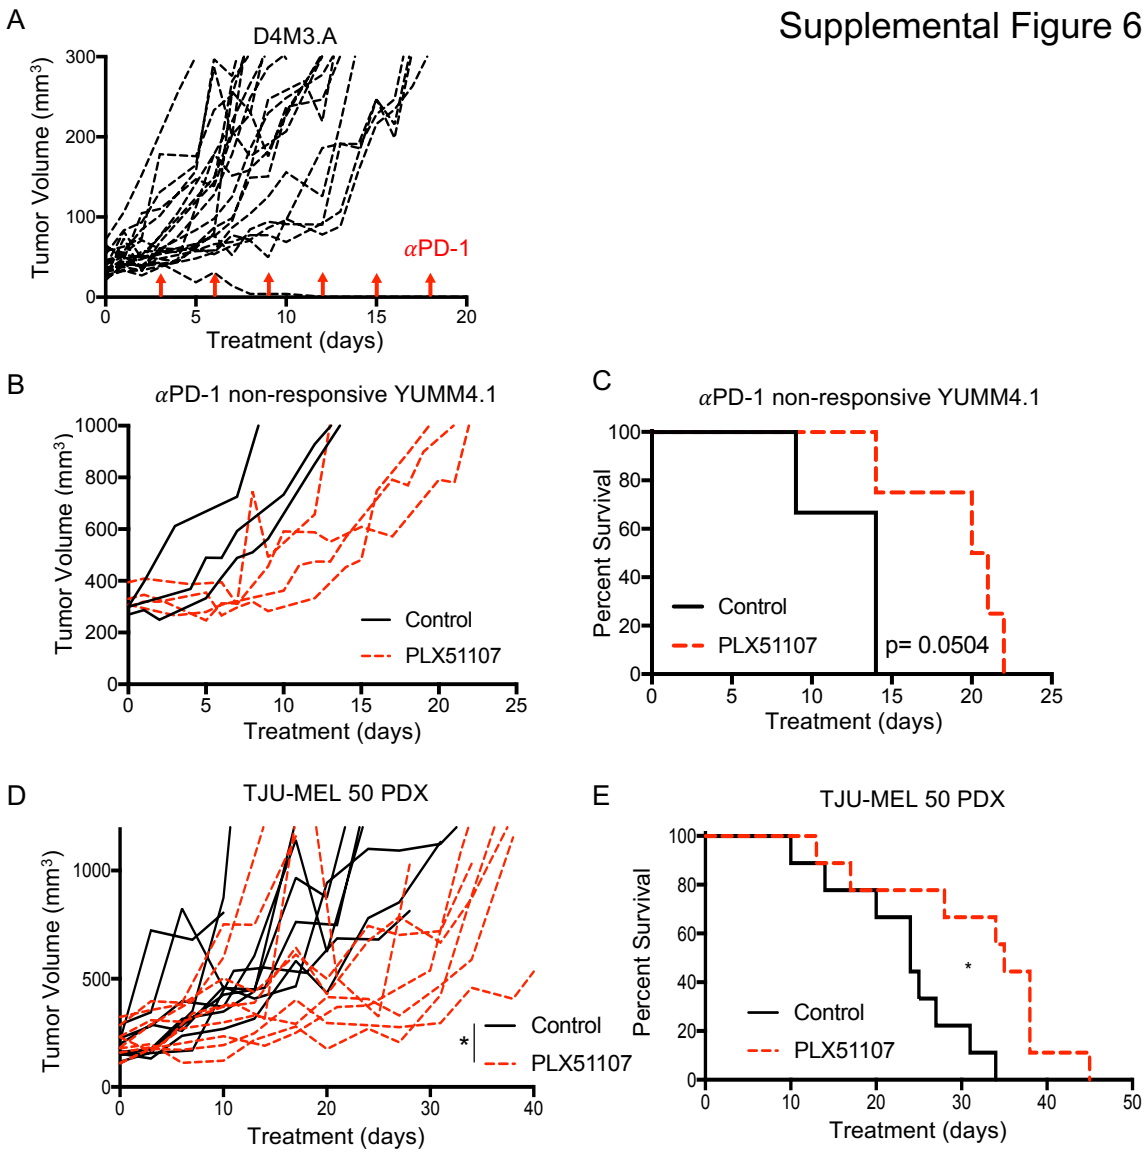

Supplement: NIHMS1028112-supplement-Supp_FigS1-6.pdf [file NIHMS1028112-supplement-Supp_FigS1-6.pdf]
